# Supplementary material for: Natural allelic variations of Saccharomyces cerevisiae impact stuck fermentation due to the combined effect of ethanol and temperature; a QTL-mapping study
Source: PubMed Central journal article supplement (PMC6714461; doi:10.1186/s12864-019-5959-8), 2019-08-28

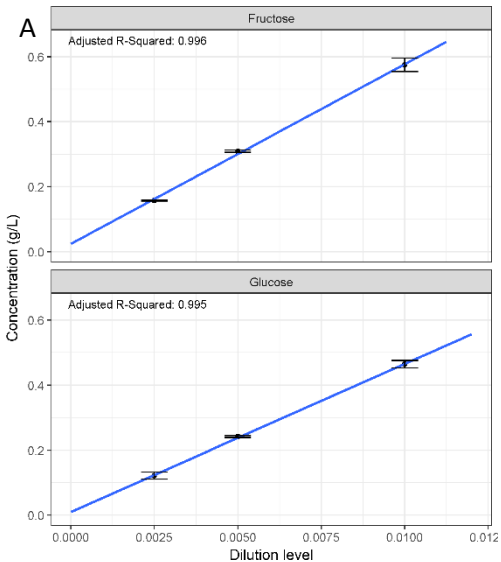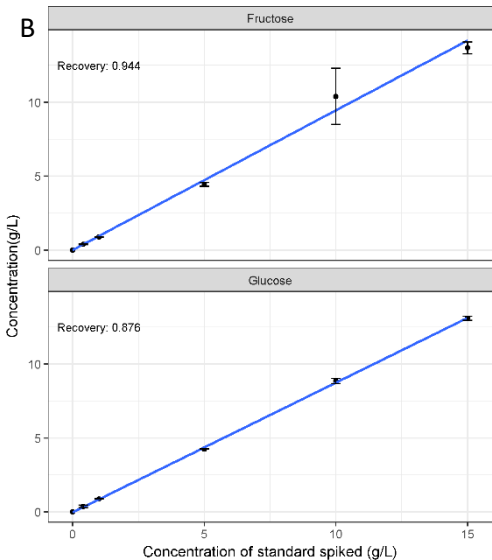

Supplement: 12864_2019_5959_MOESM10_ESM.pdf [file 12864_2019_5959_MOESM10_ESM.pdf]
